# Supplementary material for: Myokine Musclin Is Critical for Exercise-Induced Cardiac Conditioning
Source: MDPI journal article supplement (doi:10.3390/ijms24076525), 2023-03-30
Supplement: s1 [file s1]

## Supplemental materials

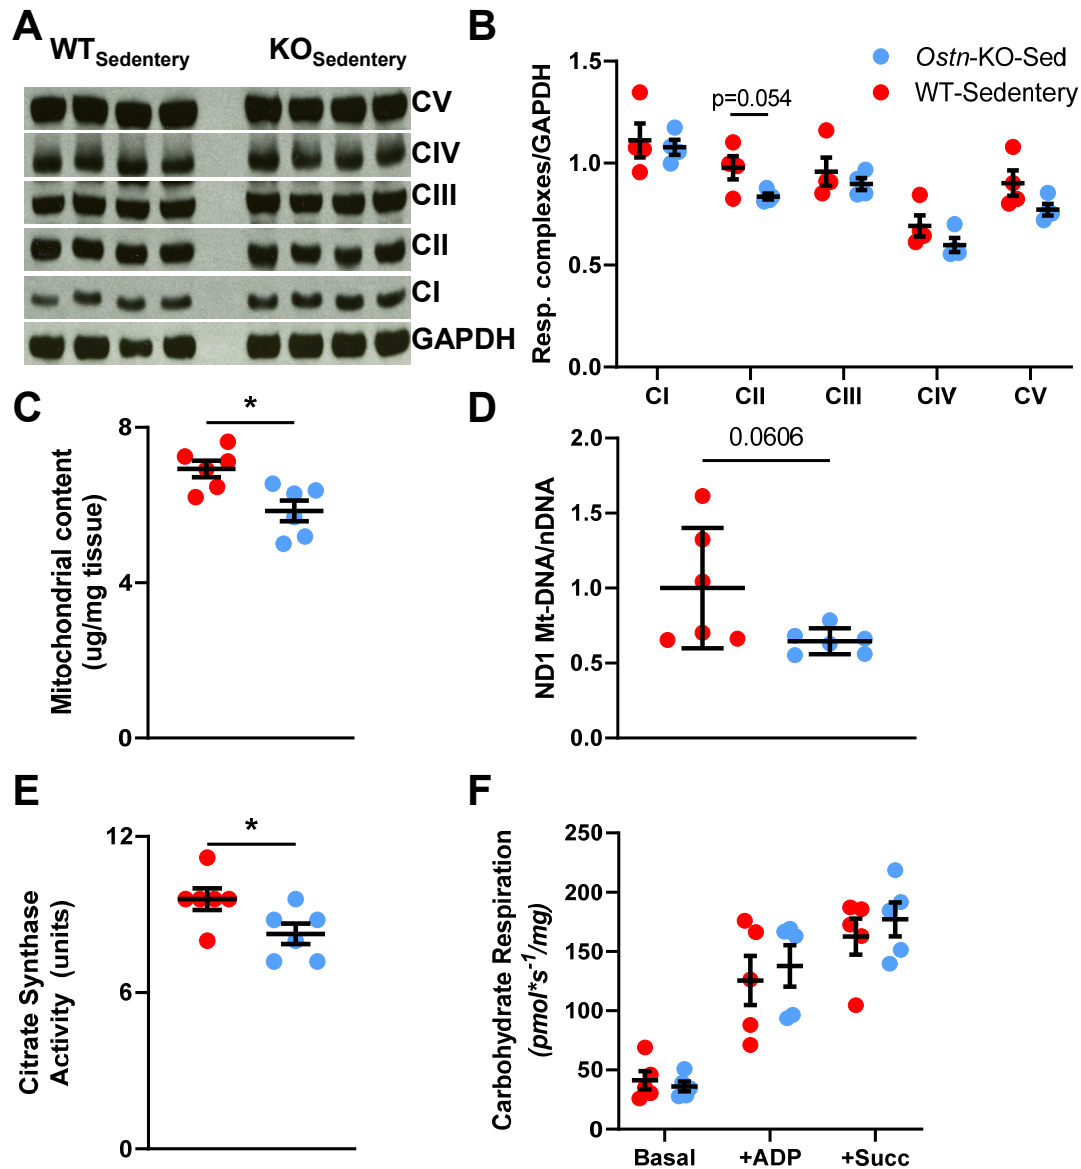

**Figure S1. Mitochondrial biogenesis and respiratory capacity in hearts of *Ostn*-KO and WT control mice under “sedentary” (regular housing) conditions.** (A) Representative western blots of respiratory chain enzymes and GAPDH and (B) summary statistics for respiratory complex expression normalized to GAPDH in hearts of sedentary WT and *Ostn*-KO mice (n=4 each): Complex I expression ( $1.08 \pm 0.08$  vs.

1.11±0.17 AU, p=0.7), complex II expression (0.83±0.03 vs. 0.98±0.11 AU, p=0.054), complex III expression (0.89±0.06 vs. 0.96±0.14 AU, p=0.45), complex IV expression (0.6±0.07 vs. 0.69±0.1 AU, p=0.18), complex V expression (0.77±0.06 vs. 0.9±0.13 AU, p=0.11) (C) Summary statistics for mitochondrial content by tissue weight in hearts from sedentary WT and *Ostn*-KO mice (n=6 each, 6.67±0.60 vs. 5.85±0.66 µg/mg tissue, p=0.01). (D) Summary statistics for expression of ND-1 normalized to hexokinase 2 in hearts from sedentary WT and *Ostn*-KO mice (n=6 each, 1.00±0.40 vs. 0.65±0.09 AU, p=0.06). (E) Summary statistics for citrate synthase activity in mitochondrial extracts from hearts of sedentary WT and *Ostn*-KO mice (n=6 each, 9.59±1.01 vs. 8.26±0.97 AU, p=0.04). (F) Summary statistics for carbohydrate driven mitochondrial respiration in semi-permeabilized fibers normalized to tissue weight in hearts from sedentary WT and *Ostn*-KO mice (n=5 each): Under carbohydrate-supported conditions respiration in myofibers isolated from hearts of sedentary WT and *Ostn*-KO mice were comparable (basal: 41.39±17.18 vs. 36.21±9.41 pmol\*s<sup>-1</sup>/mg, p=0.57, with ADP stimulation: 125.56±46.32 vs. 137.88±39.05 pmol\*s<sup>-1</sup>/mg, p=0.66, and with addition of succinate: 162.63±33.89 vs. 177.17±31.87 pmol\*s<sup>-1</sup>/mg, p=0.5). Data are means ± SD; \*P<0.05.

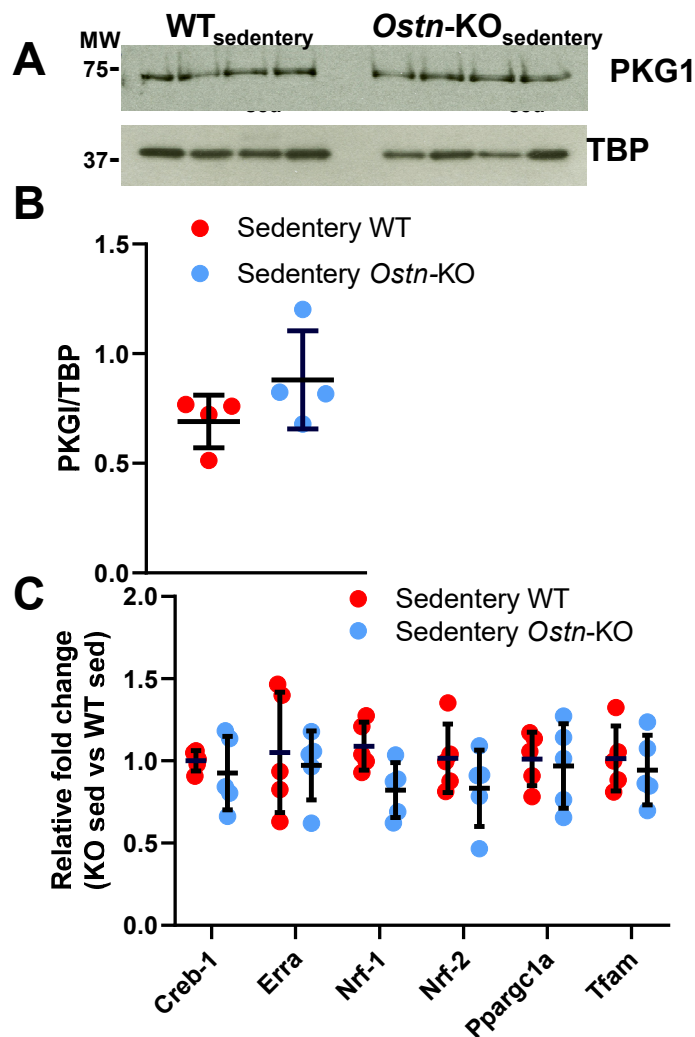

**Figure S2. Nuclear protein kinase G1 expression and mRNA expression of mitochondrial biogenesis-related genes in *Ostn*-KO and WT mice under “sedentary” (regular housing) conditions.** (A) Representative western blots of PKG1 and TATA binding protein in nuclear extracts from hearts of sedentary WT and *Ostn*-KO mice, (B) Summary statistics for PKG1 normalized TBP in nuclear extracts from hearts of sedentary WT and *Ostn*-KO mice ( $0.51 \pm 0.76$  vs.  $0.68 \pm 1.2$ ,  $n=4$ ,  $p=0.19$ ). (C) Summary statistics for mRNA expression of *Creb1*, *Erra*, *Nrf1*, *Nrf2*, *Ppargc1a*, and *Tfam* in hearts from sedentary WT and *Ostn*-KO mice ( $n=6$ ). Data are means  $\pm$  SD.

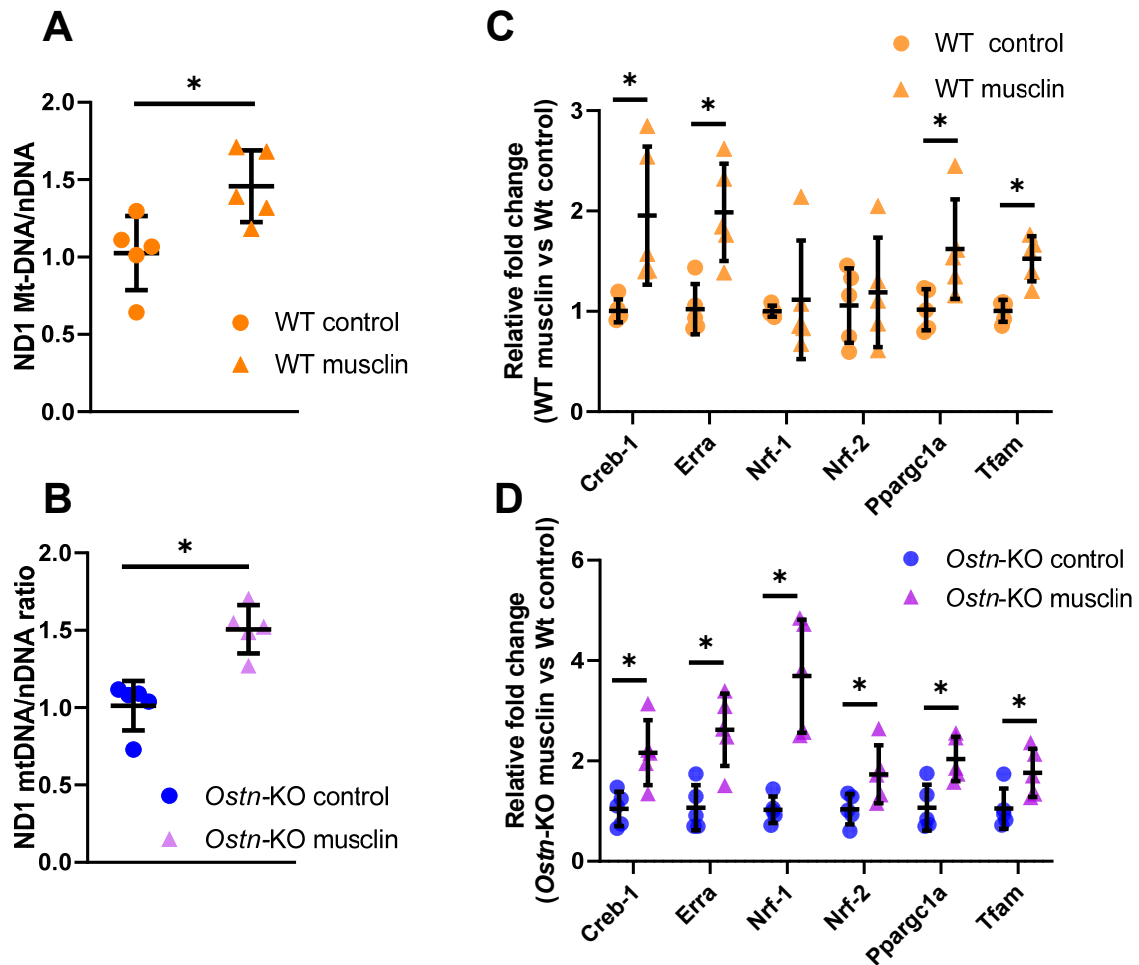

**Figure S3.** Synthetic musclin infusion promotes mitochondrial biogenesis. (A) Summary statistics for expression of ND-1 normalized to hexokinase 2 in hearts from sedentary WT mice infused with control peptide or synthetic musclin for 14 days ( $1.09 \pm 0.24$  vs.  $1.46 \pm 0.23$ ,  $n=5$  each,  $p=0.02$ ). (B) Summary statistics for expression of ND-1 normalized to hexokinase 2 in hearts from sedentary *Ostn*-KO mice infused with control peptide or synthetic musclin for 28 days ( $1.01 \pm 0.16$  vs.  $1.51 \pm 0.16$ ,  $n=5$  each,  $p=0.001$ ). (C) Summary statistics for mRNA expression of *Creb1*, *Erra*, *Nrf1*, *Nrf2*, *Ppargc1a*, and *Tfam* in hearts from sedentary WT mice infused with control peptide or synthetic musclin for 14 days (all  $n=5$  each, *Creb1*:  $1.01 \pm 0.11$  vs.  $1.95 \pm 0.69$  fold change,  $p=0.02$ , *Erra*:  $1.02 \pm 0.25$  vs.  $1.99 \pm 0.49$  fold change,  $p=0.004$ , *Nrf1*:  $1.0 \pm 0.06$  vs.  $1.12 \pm 0.59$  fold

change,  $p=0.68$ , *Nrf2*:  $1.06\pm0.37$  vs.  $1.19\pm0.55$  fold change,  $p=0.67$ , *Ppargc1a*:  $1.02\pm0.2$  vs.  $1.62\pm0.49$  fold change,  $p=0.04$ ), and *Tfam*:  $1.01\pm0.11$  vs.  $1.52\pm0.22$  fold change,  $p=0.002$ ). (D) Summary statistics for mRNA expression of *Creb1*, *Erra*, *Nrf1*, *Nrf2*, *Ppargc1a*, and *Tfam* in hearts from sedentary *Ostn*-KO mice infused with control peptide or synthetic musclin for 28 days,  $n=5$  each (*Creb1*:  $1.05\pm0.34$  vs.  $2.16\pm0.65$  fold change,  $p=0.009$ , *Erra*:  $1.07\pm0.45$  vs.  $2.62\pm0.72$  fold change,  $p=0.003$ , *Nrf1*:  $1.03\pm0.27$  vs.  $3.695\pm1.12$  fold change,  $p=0.001$ , *Nrf2*:  $1.04\pm0.3$  vs.  $1.73\pm0.58$  fold change,  $p=0.04$ , *Ppargc1a*:  $1.07\pm0.46$  vs.  $2.04\pm0.44$  fold change,  $p=0.009$ , and *Tfam*:  $1.05\pm0.4$  vs.  $1.76\pm0.48$  fold change,  $p=0.03$ ). Data are means  $\pm$  SD; \* $P<0.05$ ,.
